# Supplementary material
Source: publisher figshare collection journal article supplement (https://gsajournals.figshare.com/articles/dataset/_/6133802)
Supplement: Supplementary file 1 [file 1]

**Table S1: Yeast strains used in this study**

| Strain                       | Parent  | Genotype                                                                                                                                                | Source                  |
|------------------------------|---------|---------------------------------------------------------------------------------------------------------------------------------------------------------|-------------------------|
| DG154                        | BY4741  | <i>MATa his3Δ leu2Δ met15Δ ura3Δ gcn5Δ::kanMX4 esa1L254P</i>                                                                                            | (Ginsburg et al., 2009) |
| F729                         | BY4741  | <i>MATa his3Δ1 leu2Δ0 met15Δ0 ura3Δ0</i>                                                                                                                | (Qiu et al., 2009)      |
| WT HDACs                     | BY 4705 | <i>MATa ade2Δ::hisG HIS3Δ200 LEU2Δ0 ura3Δ0 trp1Δ63 LYS2Δ0 met15Δ0</i>                                                                                   | (Sharma et al., 2007)   |
| <i>hos2Δ/rpd3Δ</i>           | BY 4705 | <i>MATa ade2Δ::hisG HIS3Δ200 LEU2Δ0 ura3Δ0 trp1Δ63 LYS2Δ0 met15Δ0 rpd3::LEU2hos2::LYS2</i>                                                              | (Sharma et al., 2007)   |
| FH62(WT H3)                  | S288C   | <i>MATa his3Δ200 leu2Δ0 lys2Δ0 trp1Δ63 ura3Δ0 met15Δ0 can1::MFA1pr-HIS3 hht1-hhf1::NatMX4 hht2-hhf2::[HHTS-HHFS]-URA3</i>                               | Thermo Scientific       |
| FH63(WT H4)                  | S288C   | <i>MATa his3_200 leu2_0 lys2_0 trp1_63 ura3_0 met15_0 can1::MFA1pr-HIS3 hht1-hhf1::NatMX4 hht2-hhf2::[HHTS-HHFS]-URA3</i>                               | Thermo Scientific       |
| FH59(Δ1-28 H3)               | S288C   | <i>MATa his3Δ200 leu2Δ0 lys2Δ0 trp1Δ63 ura3Δ0 met15Δ0 can1::MFA1pr-HIS3 hht1-hhf1::NatMX4 hht2-hhf2::[hhts (Δ1-28)-HHFS]-URA3</i>                       | Thermo Scientific       |
| FH58(Δ1-2 H3)                | S288C   | <i>MATa his3Δ200 leu2Δ0 lys2Δ0 trp1Δ63 ura3Δ0 met15Δ0 can1::MFA1pr-HIS3 hht1-hhf1::NatMX4 hht2-hhf2::[hhts (Δ1-20)-HHFS]-URA3</i>                       | Thermo Scientific       |
| FH60 (Δ1-16 H4)              | S288C   | <i>MATa his3Δ200 leu2Δ0 lys2Δ0 trp1Δ63 ura3Δ0 met15Δ0 can1::MFA1pr-HIS3 hht1-hhf1::NatMX4 hht2-hhf2::[HHTS-hhfs (Δ1-16)]-URA3</i>                       | Thermo Scientific       |
| FH46((H3 K4, K9, K14, K18-A) | S288C   | <i>MATa his3Δ200 leu2Δ0 lys2Δ0 trp1Δ63 ura3Δ0 met15Δ0 can1::MFA1pr-HIS3 hht1-hhf1::NatMX4 hht2-hhf2:: [hhts K4,9,14,18A-HHFS]-URA3</i>                  | Thermo Scientific       |
| FH47                         | S288C   | <i>MATa his3Δ200 leu2Δ0 lys2Δ0 trp1Δ63 ura3Δ0 met15Δ0 can1::MFA1pr-HIS3 hht1-hhf1::NatMX4 hht2-hhf2::[HHTS-hhfs K5,8,12,16R]-URA3 SPT16-13myc::TRP1</i> | Thermo Scientific       |

|           |         |                                                                                                                                                         |                      |
|-----------|---------|---------------------------------------------------------------------------------------------------------------------------------------------------------|----------------------|
| FH48      | S288C   | <i>MATa his3Δ200 leu2Δ0 lys2Δ0 trp1Δ63 ura3Δ0 met15Δ0 can1::MFA1pr-HIS3 hht1-hhf1::NatMX4 hht2-hhf2::[HHTS-hhfs K5,8,12,16Q]-URA3 SPT16-13myc::TRP1</i> | Thermo<br>Scientific |
| SPT16-TET | R1158   | <i>pSPT16::kanR-tet07-TATA URA3::CMV-tTA MATa his3Δ1 leu2Δ0 met15Δ0</i>                                                                                 | Thermo<br>Scientific |
| SPT6-TET  | R1158   | <i>pSPT6::kanR-tet07-TATA URA3::CMV-tTA MATa his3Δ1 leu2Δ0 met15Δ0</i>                                                                                  | Thermo<br>Scientific |
| RP4       | BY 4741 | <i>MATa his3Δ1 leu2Δ0 met15Δ0 ura3Δ0 SPT16-13myc::HIS3</i>                                                                                              | This Study           |
| RP6       | 1257    | <i>MATa his3Δ1 leu2Δ0 met15Δ0 ura3Δ0 set1Δ::hphMX4 set2Δ::kanMX4 SPT16-13myc::HIS3</i>                                                                  | This Study           |
| RP8       | BY 4705 | <i>MATa ade2Δ::hisG HIS3Δ200 LEU2Δ0 ura3Δ0 trp1Δ63 LYS2Δ0 met15Δ0 SPT16-13myc::HIS3</i>                                                                 | This Study           |
| RP9       | BY 4705 | <i>MATa ade2Δ::hisG HIS3Δ200 LEU2Δ0 ura3Δ0 trp1Δ63 LYS2Δ0 met15Δ0 rpd3::LEU2hos2::LYS2 SPT16-13myc::HIS3</i>                                            | This Study           |
| RP10      | S288C   | <i>MATa his3Δ200 leu2Δ0 lys2Δ0 trp1Δ63 ura3Δ0 met15Δ0 can1::MFA1pr-HIS3 hht1-hhf1::NatMX4 hht2-hhf2::[HHTS-HHFS]-URA3 SPT16-13myc::TRP1</i>             | This Study           |
| RP11      | S288C   | <i>MATa his3_200 leu2_0 lys2_0 trp1_63 ura3_0 met15_0 can1::MFA1pr-HIS3 hht1-hhf1::NatMX4 hht2-hhf2::[HHTS-HHFS]-URA3, SPT16-3myc::TRP1</i>             | This Study           |
| RP12      | S288C   | <i>MATa his3Δ200 leu2Δ0 lys2Δ0 trp1Δ63 ura3Δ0 met15Δ0 can1::MFA1pr-HIS3 hht1-hhf1::NatMX4 hht2-hhf2::[hhts (Δ1-28)-HHFS]-URA3 SPT16-13myc::TRP1</i>     | This Study           |
| RP13      | S288C   | <i>MATa his3Δ200 leu2Δ0 lys2Δ0 trp1Δ63 ura3Δ0 met15Δ0 can1::MFA1pr-HIS3 hht1-hhf1::NatMX4 hht2-hhf2::[hhts (Δ1-20)-HHFS]-URA3 SPT16-13myc::TRP1</i>     | This Study           |
| RP14      | S288C   | <i>MATa his3Δ200 leu2Δ0 lys2Δ0 trp1Δ63 ura3Δ0 met15Δ0 can1::MFA1pr-HIS3 hht1-hhf1::NatMX4 hht2-hhf2::[HHTS-hhfs(Δ1-16)]-URA3SPT16-13myc::TRP1</i>       | This Study           |

|      |       |                                                                                                                                                          |            |
|------|-------|----------------------------------------------------------------------------------------------------------------------------------------------------------|------------|
| RP15 | S288C | <i>MATa his3Δ200 leu2Δ0 lys2Δ0 trp1Δ63 ura3Δ0 met15Δ0 can1::MFA1pr-HIS3 hht1-hhf1::NatMX4 hht2-hhf2:: [hhts K4,9,14,18A-HHFS]-URA3 SPT16-13myc::TRP1</i> | This Study |
| RP16 | S288C | <i>MATa his3Δ200 leu2Δ0 lys2Δ0 trp1Δ63 ura3Δ0 met15Δ0 can1::MFA1pr-HIS3 hht1-hhf1::NatMX4 hht2-hhf2::[HHTS-hhfs K5,8,12,16R]-URA3 SPT16-13myc::TRP1</i>  | This Study |
| RP17 | S288C | <i>MATa his3Δ200 leu2Δ0 lys2Δ0 trp1Δ63 ura3Δ0 met15Δ0 can1::MFA1pr-HIS3 hht1-hhf1::NatMX4 hht2-hhf2::[HHTS-hhfs K5,8,12,16Q]-URA3 SPT16-13myc::TRP1</i>  | This Study |
| RP18 | S288C | <i>MATa his3Δ200 leu2Δ0 lys2Δ0 trp1Δ63 ura3Δ0 met15Δ0 can1::MFA1pr-HIS3 hht1-hhf1::NatMX4 hht2-hhf2::[HHTS-HHFS]-URA3 H2B-HA::TRP1</i>                   | This Study |
| RP19 | S288C | <i>MATa his3Δ200 leu2Δ0 lys2Δ0 trp1Δ63 ura3Δ0 met15Δ0 can1::MFA1pr-HIS3 hht1-hhf1::NatMX4 hht2-hhf2::[hhts (Δ1-28)-HHFS]-URA3 H2B-HA::TRP1</i>           | This Study |
| RP20 | DG154 | <i>MATa his3Δ leu2Δ met15Δ ura3Δ gcn5Δ::kanMX4 esa1L254P SPT116-myc13::HIS3</i>                                                                          | This Study |
| RP21 | R1158 | <i>pSPT16::kanR-tet07-TATA URA3::CMV-tTA MATa his3Δ1 leu2Δ0 met15Δ0 SPT6Δ202::HIS3</i>                                                                   | This Study |
