# Supplementary material
Source: publisher figshare collection journal article supplement (https://gsajournals.figshare.com/articles/dataset/_/6133802)
Supplement: Supplementary file 2 [file 1]

**Table S2: Oligos used for ChIP-PCRs in this study**

| Gene            | Location | Sequences (5' – 3')      |
|-----------------|----------|--------------------------|
| <i>ARG1</i> (F) | TATA     | TAATCTGAGCAGTTGCGAGA     |
| <i>ARG1</i> (R) | TATA     | ATGTTTCCTTATCGCTGCACA    |
| <i>ARG1</i> (F) | 5' ORF   | TGGCTTATTCTGGTGGTTTAG    |
| <i>ARG1</i> (R) | 5' ORF   | ATCCACACAAACGAACTTGCA    |
| <i>ARG1</i> (F) | 3' ORF   | TTCTGGGCAGATCTACAAAGA    |
| <i>ARG1</i> (R) | 3' ORF   | AAGTCAACTCTTCACCTTTGG    |
| <i>ADH1</i> (F) | TATA     | TATACGGCCTTCCTTCCAGTT    |
| <i>ADH1</i> (R) | TATA     | TGTGCAGCAAAAGAAACAAGGA   |
| <i>ADH1</i> (F) | 5' ORF   | CCCACGGTAAGTTGGAATACA    |
| <i>ADH1</i> (R) | 5' ORF   | TGACCACCGACTAATGGTAGC    |
| <i>ADH1</i> (F) | 3' ORF   | CTTACGTCGGTAACAGAGCTGA   |
| <i>ADH1</i> (R) | 3' ORF   | ACCAACGATTTGACCCTTTTC    |
| <i>GLY1</i> (F) | TATA     | ATGTGTCCTTCTCGTCTATC     |
| <i>GLY1</i> (R) | TATA     | CTAGGAAAGGAGGTGGTT       |
| <i>GLY1</i> (F) | 5' ORF   | GTCAGACACATTCACCACT      |
| <i>GLY1</i> (R) | 5' ORF   | ACACAGAACAAACCTGCT       |
| <i>GLY1</i> (F) | 3' ORF   | AAGTACAACGTTAAGCTAAT     |
| <i>GLY1</i> (R) | 3' ORF   | ACAGTCGAAAGGATGTTCT      |
| <i>PMA1</i> (F) | TATA     | CGATTATATAAAAAGGCCAAATAT |
| <i>PMA1</i> (R) | TATA     | TATCAACGAGGTTGATAGAAAAA  |
| <i>PMA1</i> (F) | 5' ORF   | CGACGACGAAGACAGTGATA     |
| <i>PMA1</i> (R) | 5' ORF   | ATTCTTTTTTCGTCAGCCATTT   |

| Gene            | Location | Sequences (5' - 3')          |
|-----------------|----------|------------------------------|
| <i>PMA1</i> (F) | 3' ORF   | TGTTTTGGGTGGTTTCTACTACG      |
| <i>PMA1</i> (R) | 3' ORF   | TTAGGTTTCCTTTTCGTGTTGAG      |
| <i>PYK1</i> (F) | TATA     | CATCAAAACGATATTCGTTGG        |
| <i>PYK1</i> (R) | TATA     | AACCAAAGGATGAAAAAGAATG       |
| <i>PYK1</i> (F) | 5' ORF   | ACAAGTCTGTCATTGACAACG        |
| <i>PYK1</i> (R) | 5' ORF   | ATCGGTGGTGAAGATCATTT         |
| <i>PYK1</i> (F) | 3' ORF   | AAAGGAACCTGTCTCTGACT         |
| <i>PYK1</i> (R) | 3' ORF   | ACTTGCAAAGTGTTGGAGT          |
| <i>PHM8</i> (F) | 5' ORF   | AGCAGATACGACTAAATCAG         |
| <i>PHM8</i> (R) | 5' ORF   | CGATATCAAAGAAAAATACT         |
| <i>HAC1</i> (F) | 5' ORF   | AACTTGGCTATCCCTACC           |
| <i>HAC1</i> (R) | 5' ORF   | AGTCTTTTTTTTCTCTCTGCT        |
| <i>BDF2</i> (F) | 5' ORF   | ACAGAGTGCTACTGCAAATA         |
| <i>BDF2</i> (R) | 5' ORF   | GTGTCCATAGTGGAAGATAT         |
| <i>POL1</i> (F) | Mid ORF  | GACAAAATGAAGAAAATGCTGATGCACC |
| <i>POL1</i> (R) | Mid ORF  | TAATAACCTTGGTAAAACACCCTG     |

**(F) Forward oligo; (R) Reverse oligo**
